# Supplementary material for: Bioinspired silk protein modification to develop instant dissolvable microneedles with superior mechanical properties and long-term biomolecule stabilization
Source: Royal Society of Chemistry journal article supplement (doi:10.1039/d4tb02836h), 2025-01-01
Supplement: d4tb02836h1.pdf [file d4tb02836h1.pdf]

Supporting Information

**Bioinspired silk protein modification to develop instant dissolvable microneedle with superior mechanical properties, long-term biomolecule stabilization**

Jayakumar Rajendran<sup>1</sup>, Jeyashree K<sup>1</sup>, Sujith M S<sup>1</sup>, Lalitha Devi Alluri<sup>2</sup>, Jyotsnendu Giri<sup>1,\*</sup>

<sup>1</sup>Department of Biomedical Engineering, Indian Institute of Technology Hyderabad, Kandi, Telangana, 502284, India.

<sup>2</sup>Department of Pharmacology, G. Pulla Reddy College of Pharmacy, Hyderabad, Telangana, 500028, India.

**\* Correspondence to:**

Dr. Jyotsnendu Giri,

Professor

Department of Biomedical Engineering,

Indian Institute of Technology Hyderabad, Kandi- 502285, Telangana, India.

**Email:** enarm@bme.iith.ac.in , jgiri@bme.iith.ac.in

| Sample name     | composition                    | silk concentration | Trehalose/sucrose concentration | Model biomolecules/drug | <b>Materials and methods</b> |
|-----------------|--------------------------------|--------------------|---------------------------------|-------------------------|------------------------------|
| UMS4.5-DMN      | Unmodified silk                | 4.5% w/v           | -                               |                         |                              |
| UMS4.5-DMN-RT90 |                                | 4.5% w/v           | -                               |                         |                              |
| MS20-DMN        | Modified silk                  | 20% w/v            | -                               |                         |                              |
| MS15-DMN        |                                | 15% w/v            | -                               |                         |                              |
| MS10-DMN        |                                | 10% w/v            | -                               |                         |                              |
| UMS4.5-T7.5-DMN | Trehalose/sucrose incorporated | 4.5% w/v           | 7.5% w/v                        |                         | <b>Determination</b>         |
| UMS4.5-T5-DMN   |                                | 4.5% w/v           | 5% w/v                          |                         |                              |

#### **of water content of UMS-DMN and MS-DMN**

The percentage water content of UMS-DMN and MS-DMN was determined with a Q500 Thermo Gravimetric Analyser (TA Instruments, Elstree, Herts, UK). Samples of 2.0 mg were heated from ambient temperature to 300 °C at a heating rate of 10 °C min<sup>-1</sup>. Nitrogen flow rates of 40 ml min<sup>-1</sup> (balance purge gas) and 60 ml min<sup>-1</sup> (sample purge gas) were maintained for all samples. The data from thermogravimetric analysis experiments were analyzed with TA Instruments Universal Analysis 2000 software, version 4.4A (TA Instruments, Elstree, Herts, UK)

**SI**  
**Tab**  
**le 1.**  
Det  
aile  
d  
for  
mul  
atio  
n of  
all  
vari  
ants  
of  
the  
un  
mo  
difi

|                   |                                                       |          |          |                          |
|-------------------|-------------------------------------------------------|----------|----------|--------------------------|
| UMS4.5-T2.5-DMN   |                                                       | 4.5% w/v | 2.5% w/v |                          |
| MS20-T7.5-DMN     | Trehalose/sucrose<br>incorporated<br>modified silk MN | 20% w/v  | 7.5% w/v |                          |
| MS20-T5-DMN       |                                                       | 20% w/v  | 5% w/v   |                          |
| MS20-T2.5-DMN     |                                                       | 20% w/v  | 2.5% w/v |                          |
| SSD0.5-UMS-DMN    | SSD loaded                                            | 20% w/v  | 5% w/v   | 0.5 mg                   |
| SSD1-UMS-DMN      | Unmodified silk MN                                    | 20% w/v  | 5% w/v   | 1 mg                     |
| SSD2-UMS-DMN      |                                                       | 20% w/v  | 5% w/v   | 2 mg                     |
| HRP-MS20-T5-DMN   | SSD loaded<br>modified silk MN                        | 20% w/v  | 5% w/v   | 2 µg                     |
| HRP-UMS4.5-T5-DMN |                                                       | 4.5% w/v | 5% w/v   | 2 µg                     |
| PRP-UMS4.5-T5-DMN | PRP loaded<br>Unmodified silk MN                      | 4.5% w/v | 5% w/v   | 8 *10 <sup>6</sup> cells |
| PRP-MS20-T5-DMN   | SSD loaded<br>modified silk MN                        | 20% w/v  | 5% w/v   | 8 *10 <sup>6</sup> cells |

ed and modified silk microneedles

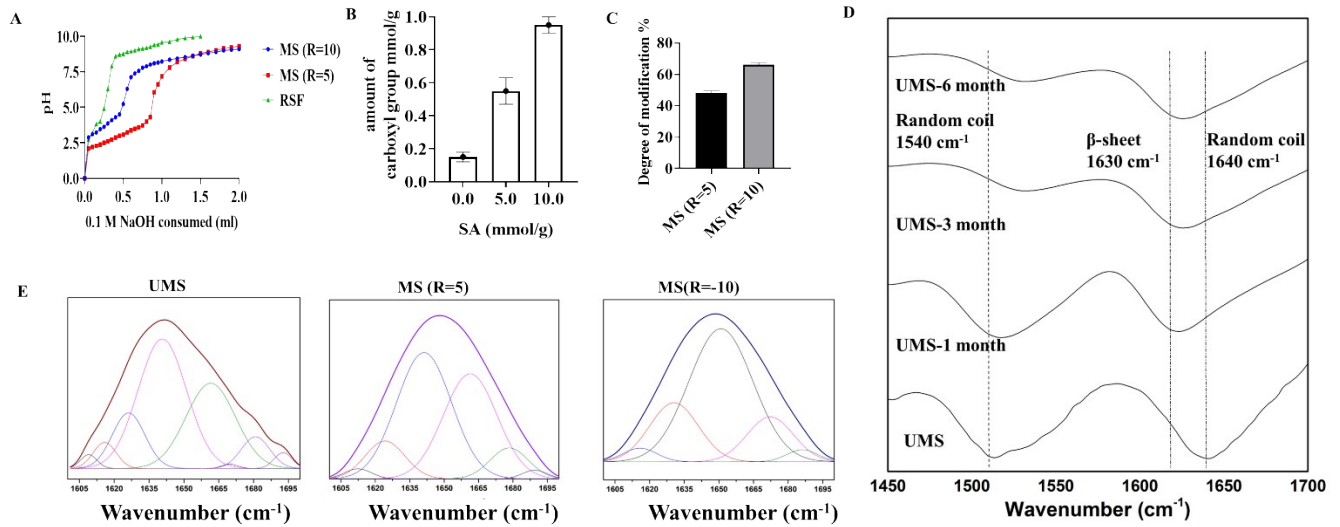

**SI Figure 1** (A) The pH vs. NaOH titration curve for the unmodified and modified silk (B) amount of carboxylic group of UMS, MS (R=5 and R=10) with the varying degree of modification with SA. (D) Deconvoluted FTIR spectra of the UMS and MS

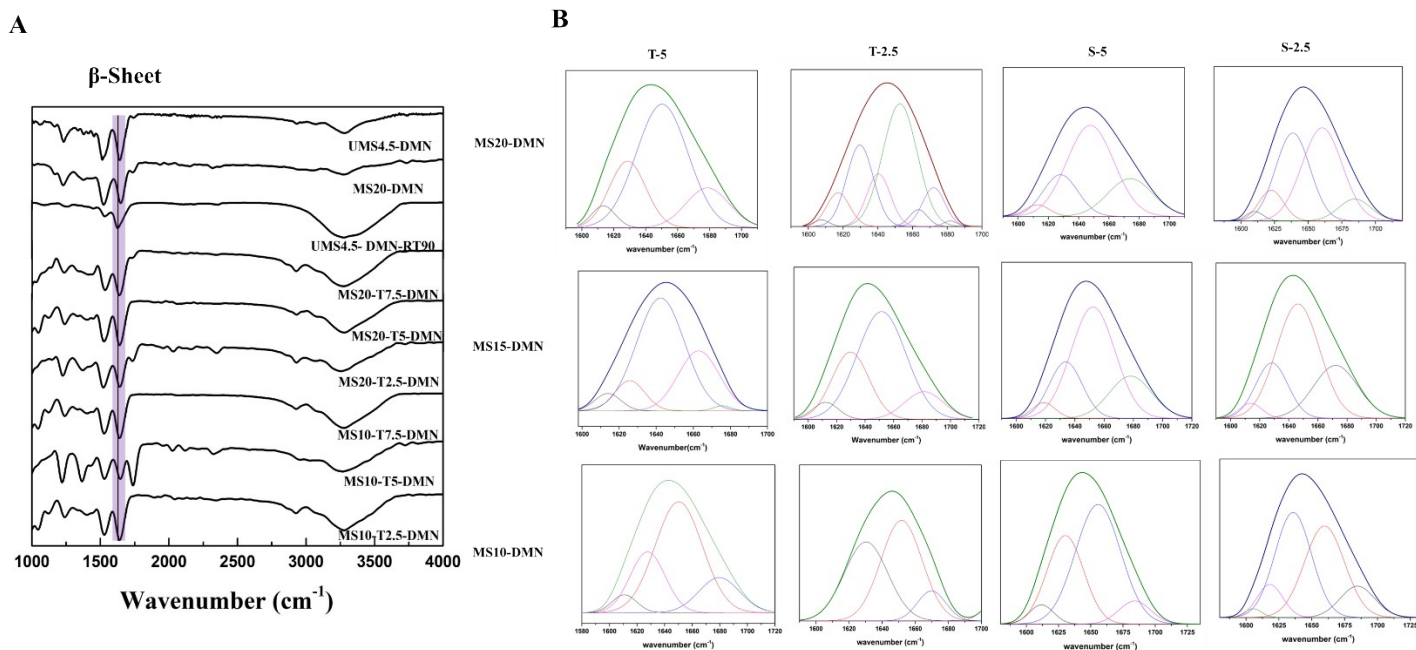

**SI Figure 2** (A) The FTIR spectra of UMS and MS with varying concentrations of the stabilizing agents (trehalose 7.5%, 5%, 2.5% w/v). (B) The deconvoluted amide I spectra of the UMS4.5-DMN, MS20-DMN, MS10-DMN incorporated with the different concentration of trehalose (7.5%, 5%, 2.5%)

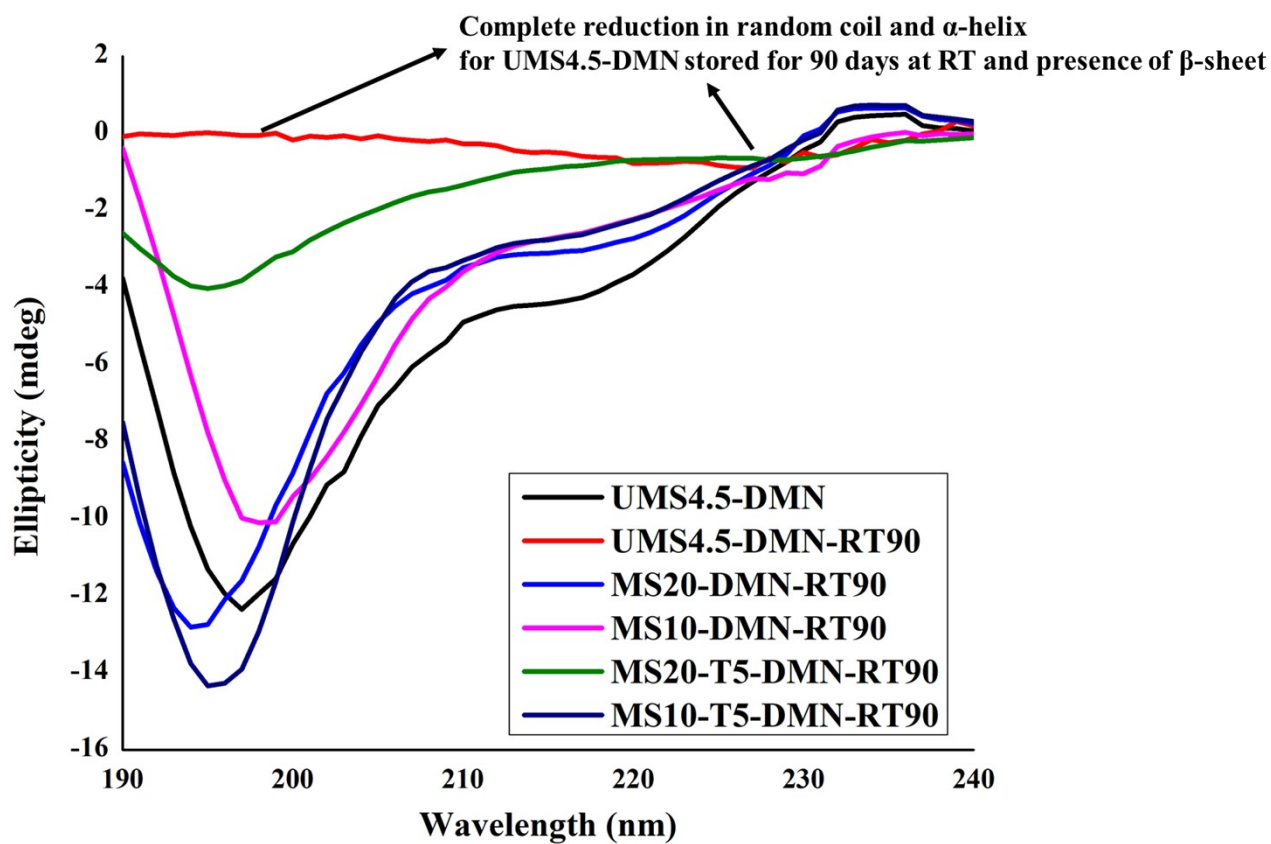

**SI Figure 3** CD spectra showing the effect of storage of MS-DMNs, MS-T-DMNs in RT for 90 days showing the presence of higher random coil/ $\alpha$ -helix whereas UMS4.5-DMN showed higher  $\beta$ -sheet in the same storage condition

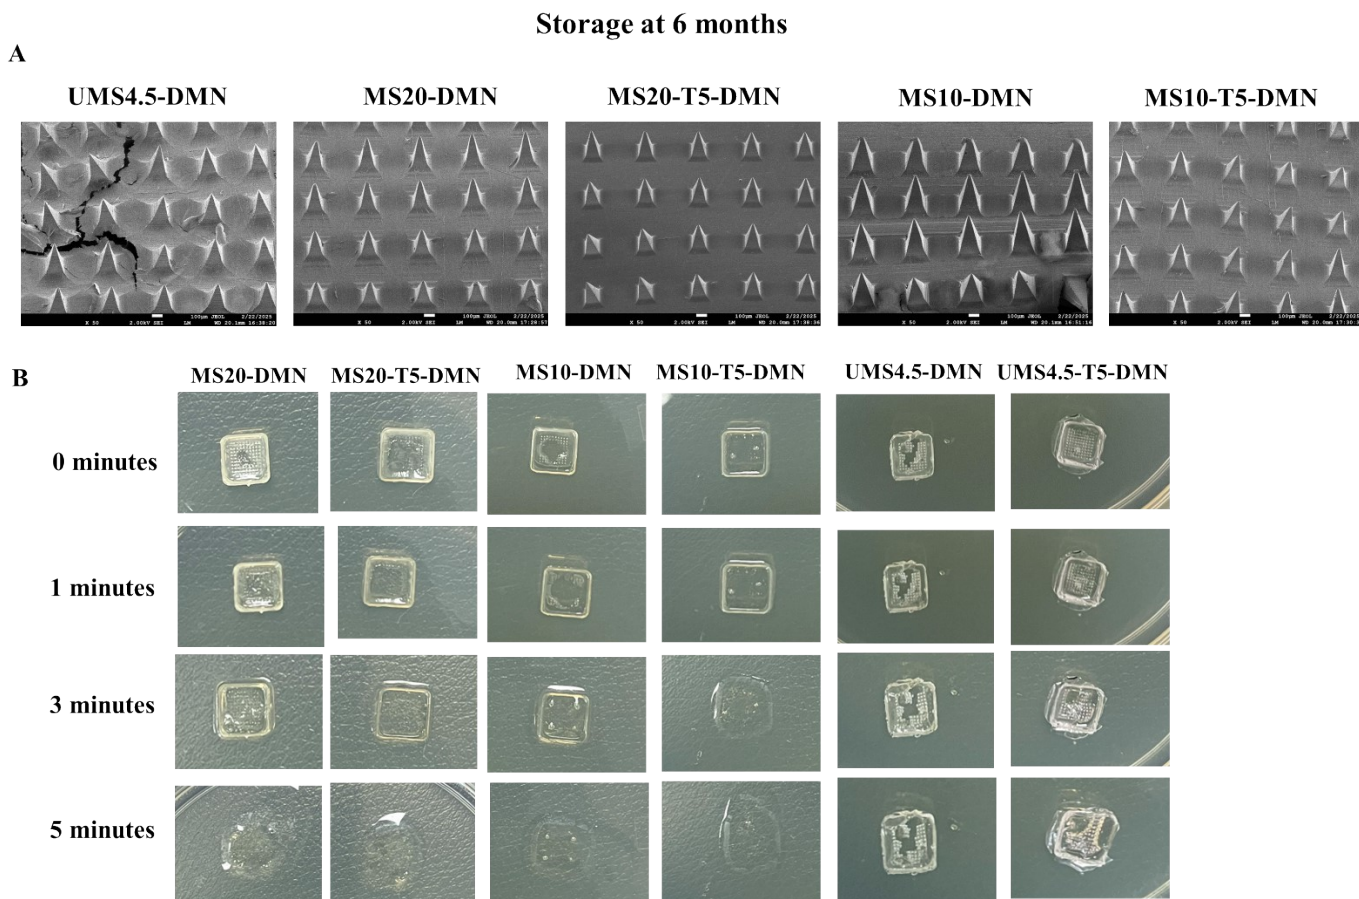

**SI Figure 4.** (A) SEM images of the stability of the microneedles after storing at 25°C for 6 months. (B) Representative optical image of the dissolving nature of the MS20-DMN, MS20-T5-DMN, MS10-DMN, MS10-T5-DMN compared with UMS4.5-DMN and UMS4.5-T5-DMN stored room temperature for 6 months.

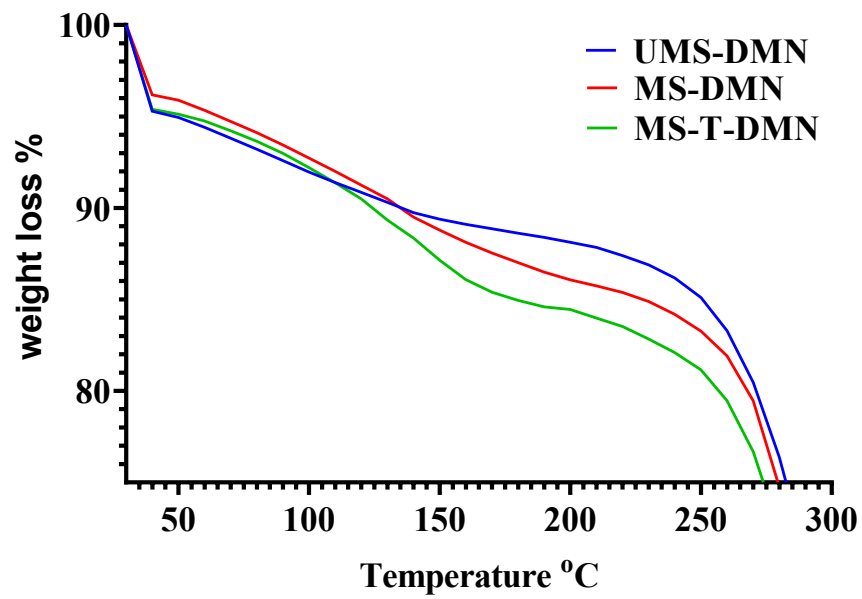

SI Figure 5. TGA analysis of the UMS-DMN, MS-DMN, MS-T-DMN

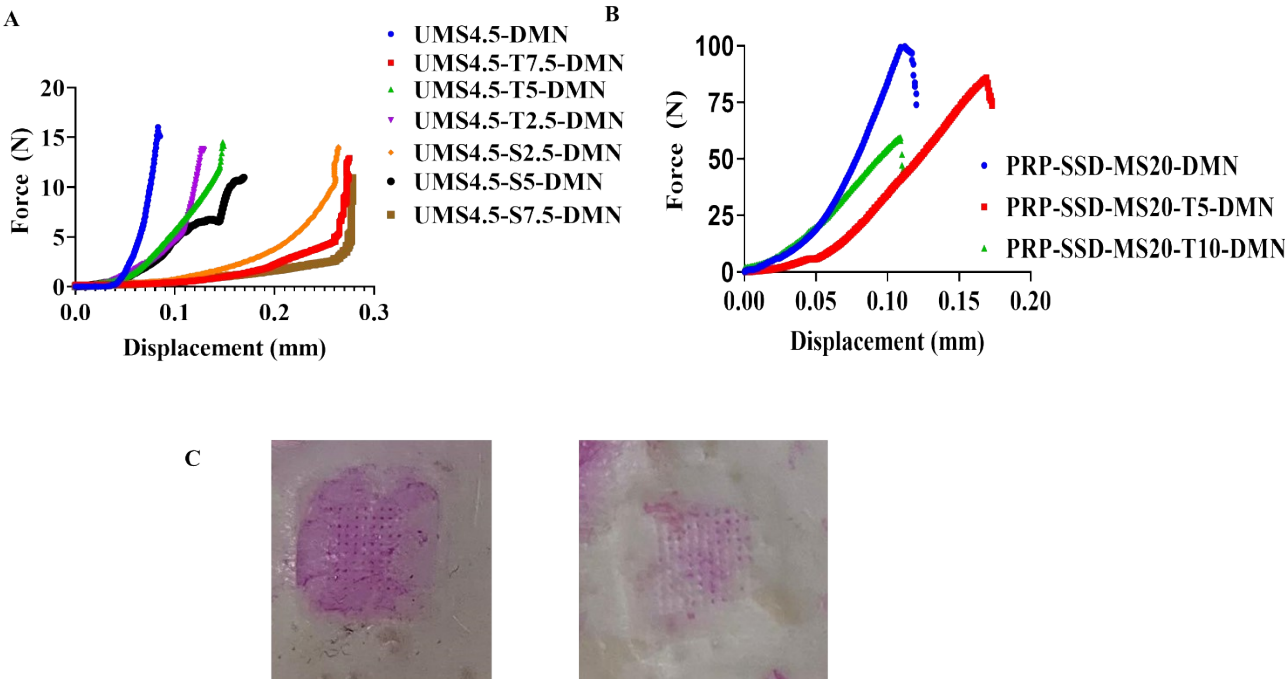



**SI Figure 6** (A) The mechanical property of the unmodified silk with the incorporation of the trehalose. (B) The mechanical property of MS20-DMN with varying concentrations of trehalose. (C) The insertion capability of the microneedle (MS20-T5-DMN and UMS4.5-DMN-RT90) was checked the porcine skin.

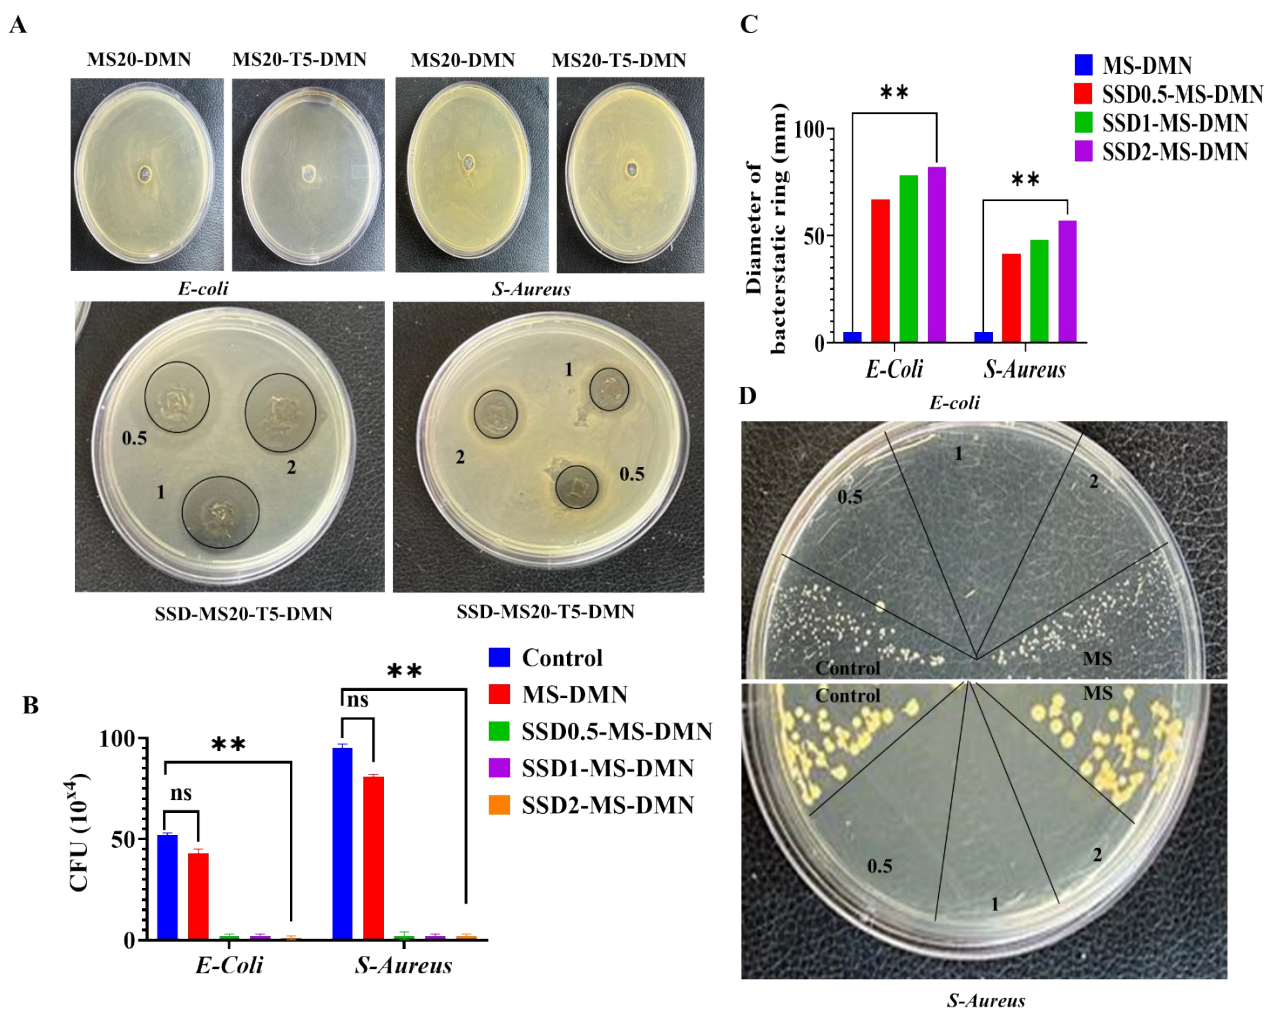

**SI Figure 7** (A). Shows the Zone of inhibition of the MS20-DMN, MS20-T5-DMN, and SSD-loaded SSD0.5/1/2-MS20-T5-DMN incubated with *S.aureus* and *E.coli* for 24 hours. (B) Quantitative analysis of zone of inhibition of various microneedles incubated with S-aureus and E-coli for 24 hours. (C) Shows the time-kill assay of different concentrations of SSD loaded SSD0.5/1/2-MS20-T5-DMN incubated with the *S.aureus* and *E.coli* for 24 hours. (D) quantitative analysis of the time-kill assay of SSD0.5/1/2-MS20-T5-DMN.



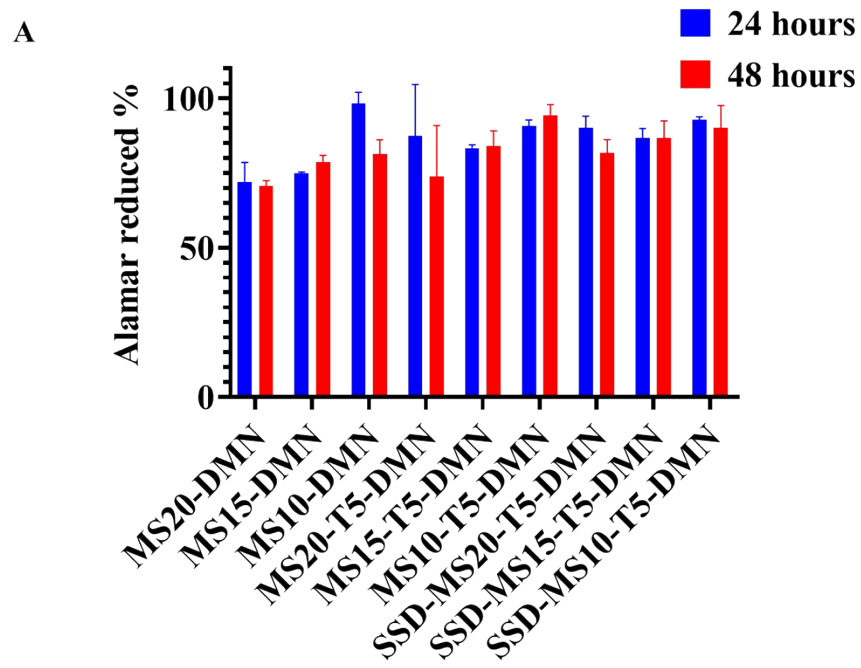

**SI Figure 8 (A)** The Alamar assay for the various silk microneedles incubated with HEK293 cells

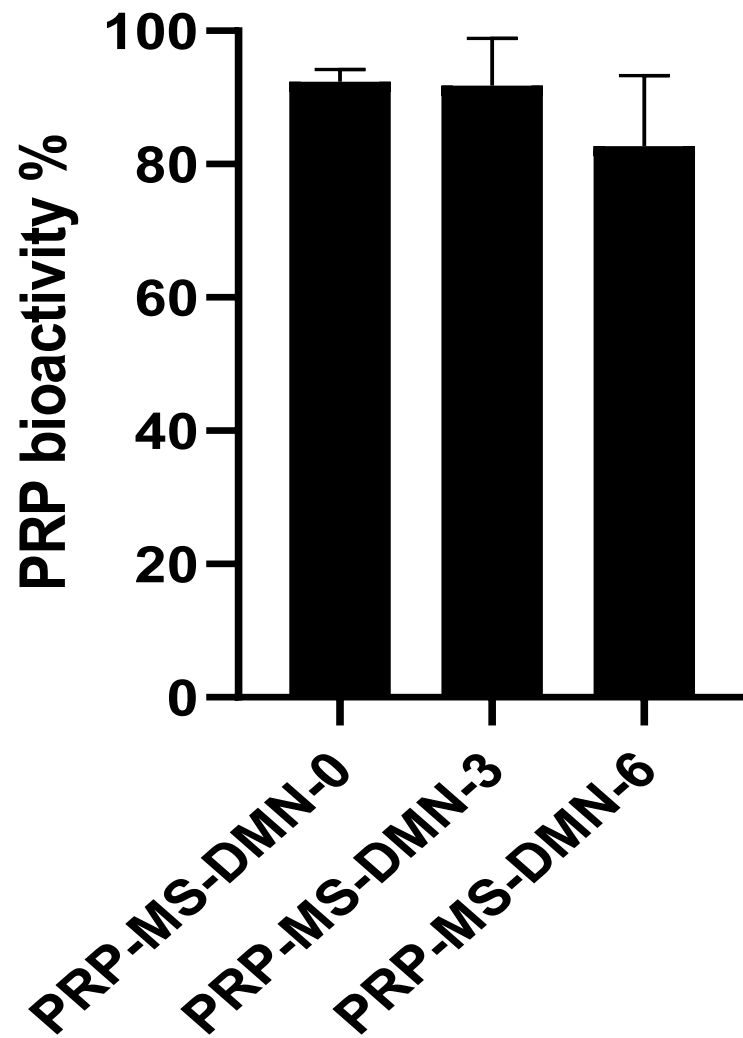

**SI Figure 9** *In-vitro* bioactivity of PRP released from the PRP-MS20-T5-DMN stored at 4<sup>0</sup>C analyzed in the UMSC

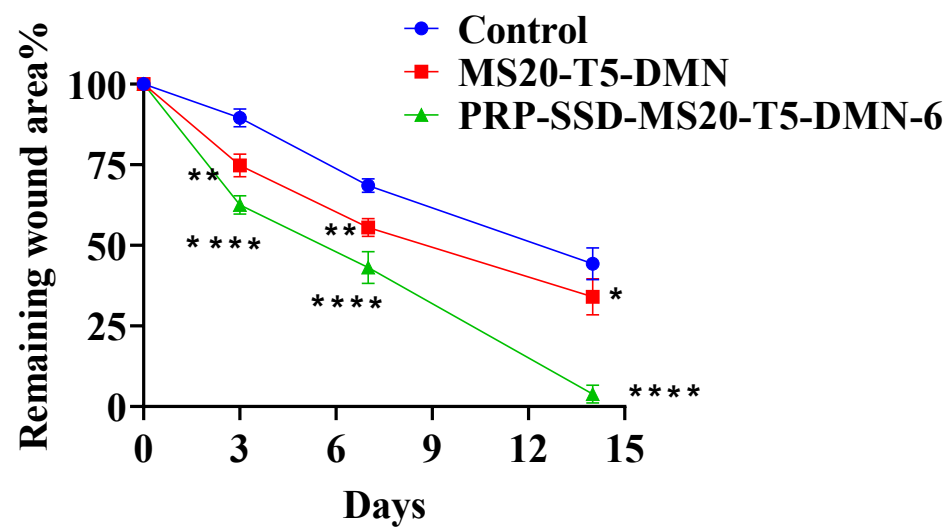

**SI Figure 10** Quantitative analysis of the wound closure rate diabetic rats treated with PBS control, PRP-MS20-T5-DMNs-0, and PRP-MS20-T5-DMNs-6.

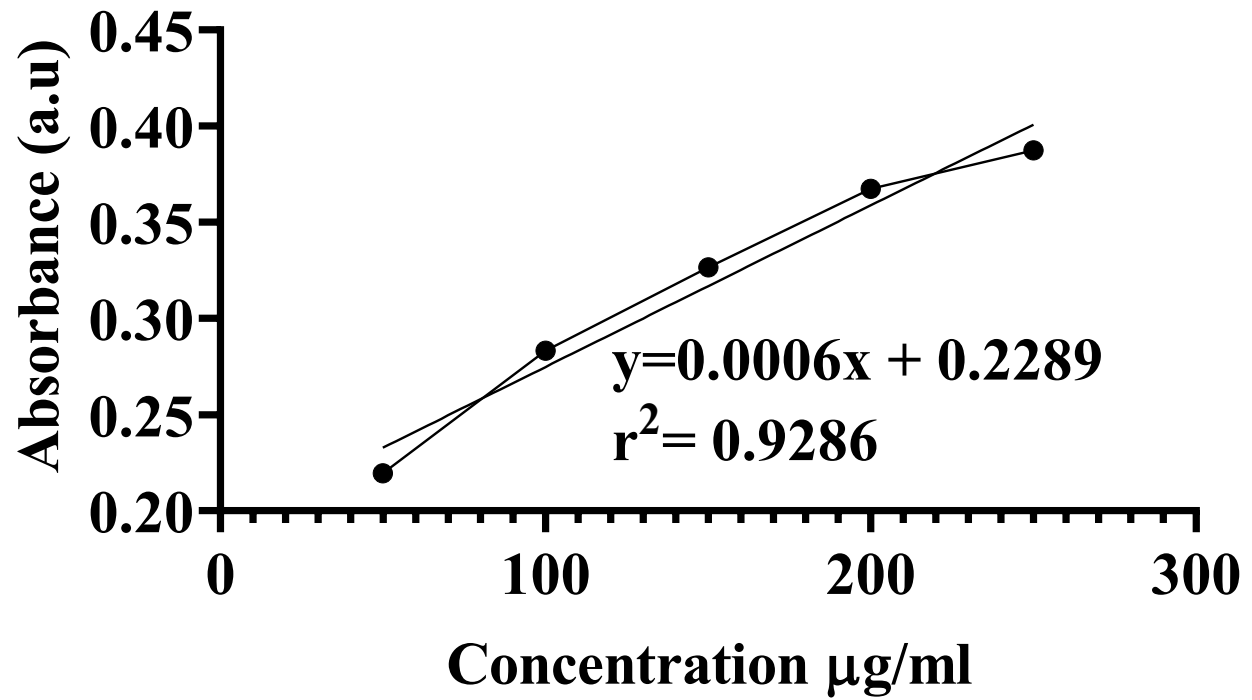

**SI Figure 11** Standard curve graph of the HRP using HRP enzymatic assay.
